# Supplementary material for: Linking Land Cover Change with Landscape Pattern Dynamics Induced by Damming in a Small Watershed
Source: MDPI journal article supplement (doi:10.3390/rs14153580), 2022-07-26
Supplement: s1 [file s1]

Supplementary Information for

## **Linking Land-Cover Change with Landscape Pattern**

### **Dynamics Induced by Damming in a Small Watershed**

Content of this file

Text S1

Table S1

Table S2

Table S3

Table S4

Table S5

Table S6

Figure S1

### Text S1 Three levels of intensity analysis

The first level is the time interval level, which addresses the question, “In which time intervals is the overall annual rate of change relatively slow or fast?” There are two equations at this level. Equation (S1) defines the annual percentage of change in the spatial extent for each time interval. Thus, Equation (S1) gives  $T-I$  rates, that is, one rate per time interval. Equation (S2) defines the annual uniform rate of change when we distribute the overall change that occurred uniformly during all intervals from the first to the last time point. If  $A_t < U$ , then  $A_t$  is slow, meaning the time interval  $[Y_t, Y_{t+1}]$  experiences change more slowly than if the changes during all time intervals are distributed uniformly during the temporal extent  $[Y_1, Y_T]$ . If  $A_t > U$ , then  $A_t$  is fast, meaning the time interval  $[Y_t, Y_{t+1}]$  changes faster than if the changes during all time intervals are distributed uniformly during the temporal extent  $[Y_1, Y_T]$ .

$$A_t = \frac{\{\sum_{j=1}^J [(\sum_{i=1}^I c_{tij}) - c_{tij}]\} 100\%}{(Y_{t+1} - Y_t) \sum_{j=1}^J (\sum_{i=1}^I c_{tij})} \quad (S1)$$

$$U = \frac{\{\sum_{t=1}^{T-1} \{\sum_{j=1}^J [(\sum_{i=1}^I c_{tij}) - c_{tij}]\} \} 100\%}{(Y_T - Y_1) \sum_{j=1}^J (\sum_{i=1}^I c_{tij})} \quad (S2)$$

The second level is the category level, which examines how the loss intensity  $L_{ti}$  from category  $i$  and the gain intensity  $G_{tj}$  to category  $j$  compares to a uniform intensity  $A_t$  during each time interval  $[Y_t, Y_{t+1}]$ . If  $L_{ti} < A_t$ , then  $L_{ti}$  is dormant, meaning category  $i$  loses less than if the change during the time interval  $[Y_t, Y_{t+1}]$  were distributed uniformly across the spatial extent. If  $L_{ti} > A_t$ , then  $L_{ti}$  is active, meaning category  $i$  loses more than if the changes during time interval  $[Y_t, Y_{t+1}]$  were distributed uniformly across the spatial extent. Similarly, if  $G_{tj} < A_t$ , then  $G_{tj}$  is dormant, and if  $G_{tj} > A_t$ , then  $G_{tj}$  is active. Equation (S3) gives  $L_{ti}$  and Equation (S4) gives  $G_{tj}$ .

$$L_{ti} = \frac{[(\sum_{j=1}^J c_{tij}) - c_{tij}] 100\%}{(Y_{t+1} - Y_t) \sum_{j=1}^J c_{tij}} \quad (S3)$$

$$G_{tj} = \frac{[(\sum_{i=1}^I c_{tij}) - c_{tij}] 100\%}{(Y_{t+1} - Y_t) \sum_{i=1}^I c_{tij}} \quad (S4)$$

The third level is the transition level, which examines how the transition intensity  $R_{tij}$  from category  $i$  to category  $j$  is compared to a uniform transition intensity  $W_{tj}$  given the gain of category  $j$  during the time interval  $[Y_t, Y_{t+1}]$ . If  $R_{tij} < W_{tj}$ , then the gain of  $j$  avoids  $i$ , meaning the gain of  $j$  transitions from  $i$  less intensively during the time interval  $[Y_t, Y_{t+1}]$  than if the gain of  $j$  is to have transitioned uniformly from the space that is not  $j$  at time  $Y_t$ . If  $R_{tij} > W_{tj}$ , then the gain of  $j$  targets  $i$ , meaning the gain of  $j$  transitions from  $i$  more intensively during the time interval  $[Y_t, Y_{t+1}]$  than if the gain of  $j$  is to have transitioned uniformly from the space that is not  $j$  at time  $Y_t$ . Equation (S5) gives  $R_{tij}$ , and Equation (S6) gives  $W_{tj}$ . The order of subscripts  $j$  and  $i$  in  $C_{tji}$  in the denominator of Equation (S6) is intentional, so that the summation over  $i$  subtracts category  $j$  at the initial time  $Y_t$ .

$$R_{tij} = \frac{c_{tij} 100\%}{(Y_{t+1} - Y_t) \sum_{j=1}^J c_{tij}} \quad (S5)$$

$$W_{tj} = \frac{[(\sum_{i=1}^I c_{tij}) - c_{tjj}] 100\%}{(Y_{t+1} - Y_t) \sum_{i=1}^I [(\sum_{j=1}^J c_{tij}) - c_{tji}]} \quad (S6)$$

Table S1 The image information used for the land use classification

| Image Source  | Data       | Spatial Resolution (m) |
|---------------|------------|------------------------|
| SPOT          | 2004/02/01 | 2.5                    |
| Landsat7 ETM+ | 2001/11/22 | 30                     |
|               | 2002/12/08 |                        |
| Landsat5 TM   | 2003/12/06 | 30                     |
|               | 2004/11/30 |                        |

Table S2 error matrix of the land cover classification accuracy assessment in 2004

|                     |          | Validation points |          |          |          |         |       |
|---------------------|----------|-------------------|----------|----------|----------|---------|-------|
|                     | Class    | Water             | Woodland | Bareland | Cropland | Builtup | Total |
| Reference<br>points | Water    | 258               | 0        | 0        | 0        | 0       | 258   |
|                     | Woodland | 1                 | 168      | 3        | 7        | 11      | 190   |
|                     | Bareland | 3                 | 1        | 274      | 0        | 88      | 366   |
|                     | Cropland | 0                 | 0        | 0        | 96       | 5       | 102   |
|                     | Builtup  | 3                 | 0        | 0        | 1        | 329     | 334   |
|                     | Total    | 265               | 169      | 278      | 105      | 433     | 1250  |
|                     | Accuracy | 97.4%             | 99.4%    | 98.6%    | 91.4%    | 76.0%   | 90.0% |

Table S3 land use classification system

| Land use type | Definition                                                                    |
|---------------|-------------------------------------------------------------------------------|
| Water         | Including lake, pond, river, and others                                       |
| Woodland      | Including trees, bamboo, shrubs, and other forest trees                       |
| Bareland      | Including saline-alkali, sand, gravel,<br>bare-cropland, and others           |
| Cropland      | Including rice, greenhouse, and others                                        |
| Builtup       | Including the developed land for urban residents, industrial and mining land, |

---

commercial gathering areas, national defense, places of interest, and other  
constructive land

---

Table S4 mathematical notation

| Notation  | Meaning                                                                                                                                                                                 |
|-----------|-----------------------------------------------------------------------------------------------------------------------------------------------------------------------------------------|
| $T$       | number of time points                                                                                                                                                                   |
| $Y_t$     | year at time point $t$                                                                                                                                                                  |
| $t$       | index for a time point                                                                                                                                                                  |
| $J$       | number of categories                                                                                                                                                                    |
| $i$       | index for a category                                                                                                                                                                    |
| $j$       | index for a category                                                                                                                                                                    |
| $C_{tij}$ | number of pixels that are category $i$ at time point $t$ and category $j$ at time point $t+1$                                                                                           |
| $C_{tji}$ | number of pixels that are category $j$ at time point $t$ and category $i$ at time point $t+1$                                                                                           |
| $A_t$     | annual change percentage during time interval $[Y_t, Y_{t+1}]$                                                                                                                          |
| $U$       | uniform intensity of annual change percentage during the temporal extent $[Y_1, Y_T]$                                                                                                   |
| $G_{tj}$  | intensity of annual gain of category $j$ during time interval $[Y_t, Y_{t+1}]$ relative to size of category $j$ at time point $t+1$                                                     |
| $L_{ti}$  | intensity of annual loss of category $i$ during time interval $[Y_t, Y_{t+1}]$ relative to size of category $i$ at time point $t$                                                       |
| $R_{tij}$ | intensity of annual transition from category $i$ to category $j$ during time interval $[Y_t, Y_{t+1}]$ relative to size of category $i$ at time point $t$                               |
| $W_{tj}$  | uniform intensity of annual transition from all non- $j$ categories to category $j$ during time interval $[Y_t, Y_{t+1}]$ relative to size of all non- $j$ categories at time point $t$ |

---

Table S5 Equations and descriptions of landscape metrics

|                | Equations                                                                                                                                                                                                                                                                                                                                                                                                                                                                                                                                                                          | Description                                                                                                                                                                                                                                                                                                                                                                                                               |
|----------------|------------------------------------------------------------------------------------------------------------------------------------------------------------------------------------------------------------------------------------------------------------------------------------------------------------------------------------------------------------------------------------------------------------------------------------------------------------------------------------------------------------------------------------------------------------------------------------|---------------------------------------------------------------------------------------------------------------------------------------------------------------------------------------------------------------------------------------------------------------------------------------------------------------------------------------------------------------------------------------------------------------------------|
| <b>AREA_MN</b> | $AREA\_MN = \frac{\sum_{i=1}^m \sum_{j=1}^n x_{ij}}{N}$ <p> <math>x_{ij}</math> = the area of j patch at class i<br/> <math>N</math> = total number of patches </p>                                                                                                                                                                                                                                                                                                                                                                                                                | <p>Patch Area Mean (AREA_MN) is a crucial index reflecting landscape heterogeneity. The distribution interval of its value restricts the scope of the image or map and the selection of the minimum patch size in the landscape, and it can also represent the degree of landscape fragmentation.</p>                                                                                                                     |
| <b>SHDI</b>    | $SHDI = -\sum_{i=1}^m (p_i * \ln p_i)$ <p> <math>p_i</math> = proportion of the landscape occupied by patch type (class) i. </p>                                                                                                                                                                                                                                                                                                                                                                                                                                                   | <p>Shannon's Diversity Index (SHDI) can reflect landscape heterogeneity and is sensitive to the unbalanced distribution of various patch types in the landscape, emphasizing the contribution of rare patch types to information. The higher the values of SHDI, the more heterogeneity in the landscape pattern.</p>                                                                                                     |
| <b>CONTAG</b>  | $CONTAG = \left[ 1 + \frac{\sum_{i=1}^m \sum_{k=1}^m \left[ p_i \frac{g_{ik}}{\sum_{k=1}^m g_{ik}} \right] \left[ \ln \left( p_i \frac{g_{ik}}{\sum_{k=1}^m g_{ik}} \right) \right] \right]}{2 \ln(m)} \right] (100)$ <p> <math>p_i</math> = proportion of the landscape occupied by patch type (class) i<br/> <math>g_{ik}</math> = number of adjacencies (joins) between pixels of patch types (classes) i and k based on the double-count method<br/> <math>m</math> = number of patch types (classes) present in the landscape, including the landscape border if present </p> | <p>Contagion Index (CONTAG) can reflect the connectivity of dominant patches in landscape patterns. The higher the value is, the higher the integrity of the landscape pattern is. A high CONTAG is conducive in preventing the infiltration and diffusion of agricultural non-point source pollution. The lower the sprawl index is, the higher the risk of diffusion of external disturbance in landscape patterns.</p> |

|            |                                                                                                                                                               |                                                                                                                                                                                                                                                                                                                                                                                                                                                                                          |
|------------|---------------------------------------------------------------------------------------------------------------------------------------------------------------|------------------------------------------------------------------------------------------------------------------------------------------------------------------------------------------------------------------------------------------------------------------------------------------------------------------------------------------------------------------------------------------------------------------------------------------------------------------------------------------|
| <b>ED</b>  | $ED = \frac{1}{A} \sum_{i=1}^M \sum_{j=1}^M P_{ij}$                                                                                                           | <p>ED refers to the edge length between patches of heterogeneous landscape elements per unit area within the landscape scope. ED is an important indicator used to analyze patch shape, indicating the degree of segmentation of landscape types. It can reflect the greater the boundary density of landscape fragmentation, indicating that the higher degree of segmentation of a landscape type, and the more scattered the layout.</p>                                              |
|            | $ED_i = \frac{1}{A} \sum_{j=1}^M P_{ij}$                                                                                                                      |                                                                                                                                                                                                                                                                                                                                                                                                                                                                                          |
|            | <p><math>P_{ij}</math> = the boundary length between category i landscape element patches and adjacent category j landscape element patches in landscape.</p> |                                                                                                                                                                                                                                                                                                                                                                                                                                                                                          |
|            | <p>ED = the edge length between patches of heterogeneous landscape elements per unit area within the landscape scope.</p>                                     |                                                                                                                                                                                                                                                                                                                                                                                                                                                                                          |
| <b>LSI</b> | $LSI = \frac{0.25E}{\sqrt{A}}$                                                                                                                                | <p>LSI is the total landscape boundary and all edges within the boundary divided by the square root of the total landscape area (square meters) and adjusted by a constant (circular standard for vector layers, square standard for rasters). The LSI positively correlates with landscape shape irregularity or amounts of edge within the landscape. LSI can reflect the complexity of plaque shapes.</p>                                                                             |
|            | <p>E = the total length of all patch boundaries in the landscape</p>                                                                                          |                                                                                                                                                                                                                                                                                                                                                                                                                                                                                          |
|            | <p>A = the total area of the landscape</p>                                                                                                                    |                                                                                                                                                                                                                                                                                                                                                                                                                                                                                          |
|            |                                                                                                                                                               |                                                                                                                                                                                                                                                                                                                                                                                                                                                                                          |
| <b>LPI</b> | $LPI = \frac{A_{max}}{\sum A}$                                                                                                                                | <p>LPI is equal to the proportion of the total landscape area occupied by the largest patch in a patch type. This metric is helpful in determining the ecological characteristics of a landscape, such as the pattern of land or dominant type, and determines the abundance of dominant species within the landscape. The value of this index can help determine the dominant patch types in the landscape and indirectly reflect the direction and magnitude of human disturbance.</p> |
|            | <p><math>A_{max}</math> = the area of the largest patch in a patch type</p>                                                                                   |                                                                                                                                                                                                                                                                                                                                                                                                                                                                                          |
|            | <p><math>\sum A</math> = the total area of the patch type</p>                                                                                                 |                                                                                                                                                                                                                                                                                                                                                                                                                                                                                          |
|            |                                                                                                                                                               |                                                                                                                                                                                                                                                                                                                                                                                                                                                                                          |

$$IJI = \frac{-\sum_{i=1}^m \sum_{k=i+1}^m \left[ \left( \frac{e_{ik}}{E} \right) \ln \left( \frac{e_{ik}}{E} \right) \right]}{\ln \frac{1}{2} m(m-1)} (100)$$

i and k = patch type from 1 to m

j = patch number from 1 to n

## IJI

IJI is one of the most important indicators in describing landscape spatial patterns. IJI has a significant effect on the distribution characteristics of ecosystems severely restricted by certain natural conditions. Various ecosystems in mountain areas are seriously affected by vertical zonality, as their distribution is mostly circular, and IJI value is generally low. However, many transitional vegetation types in arid areas are subject to the distribution and abundance of water, and are adjacent to each other, with higher IJI values.

Table S6 land use area during 2001–2004

| Year | Land use area (m <sup>2</sup> ) |           |          |           |            | Total      |
|------|---------------------------------|-----------|----------|-----------|------------|------------|
|      | Water                           | Woodland  | Bareland | Cropland  | Builtup    |            |
| 2001 | 377,100                         | 9,124,425 | 10,800   | 4,644,675 | 10,449,225 | 24,606,225 |
| 2002 | 655,875                         | 9,100,125 | 0        | 3,852,675 | 10,997,550 |            |
| 2003 | 327,825                         | 8,304,075 | 0        | 1,855,125 | 14,119,200 |            |
| 2004 | 510,750                         | 7,356,375 | 180,450  | 1,975,500 | 14,583,150 |            |

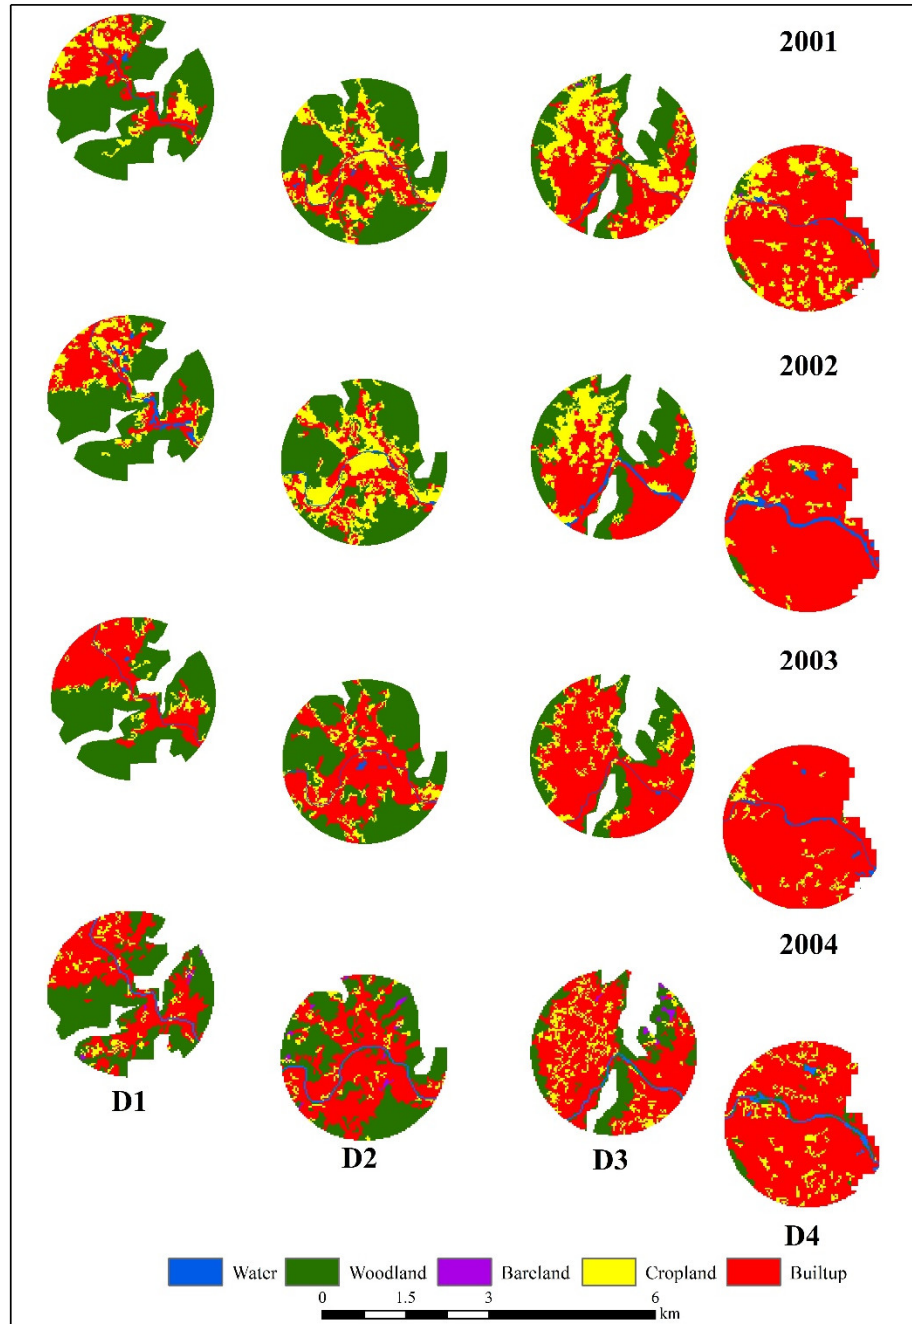

Figure S1 land use/land cover in the impacted area
